# Supplementary material
Source: publisher site journal article supplement (https://www.dovepress.com/article/542944)
Supplement: Supplementary file 1 [file 542944Supplementary%20materials.docx]

**
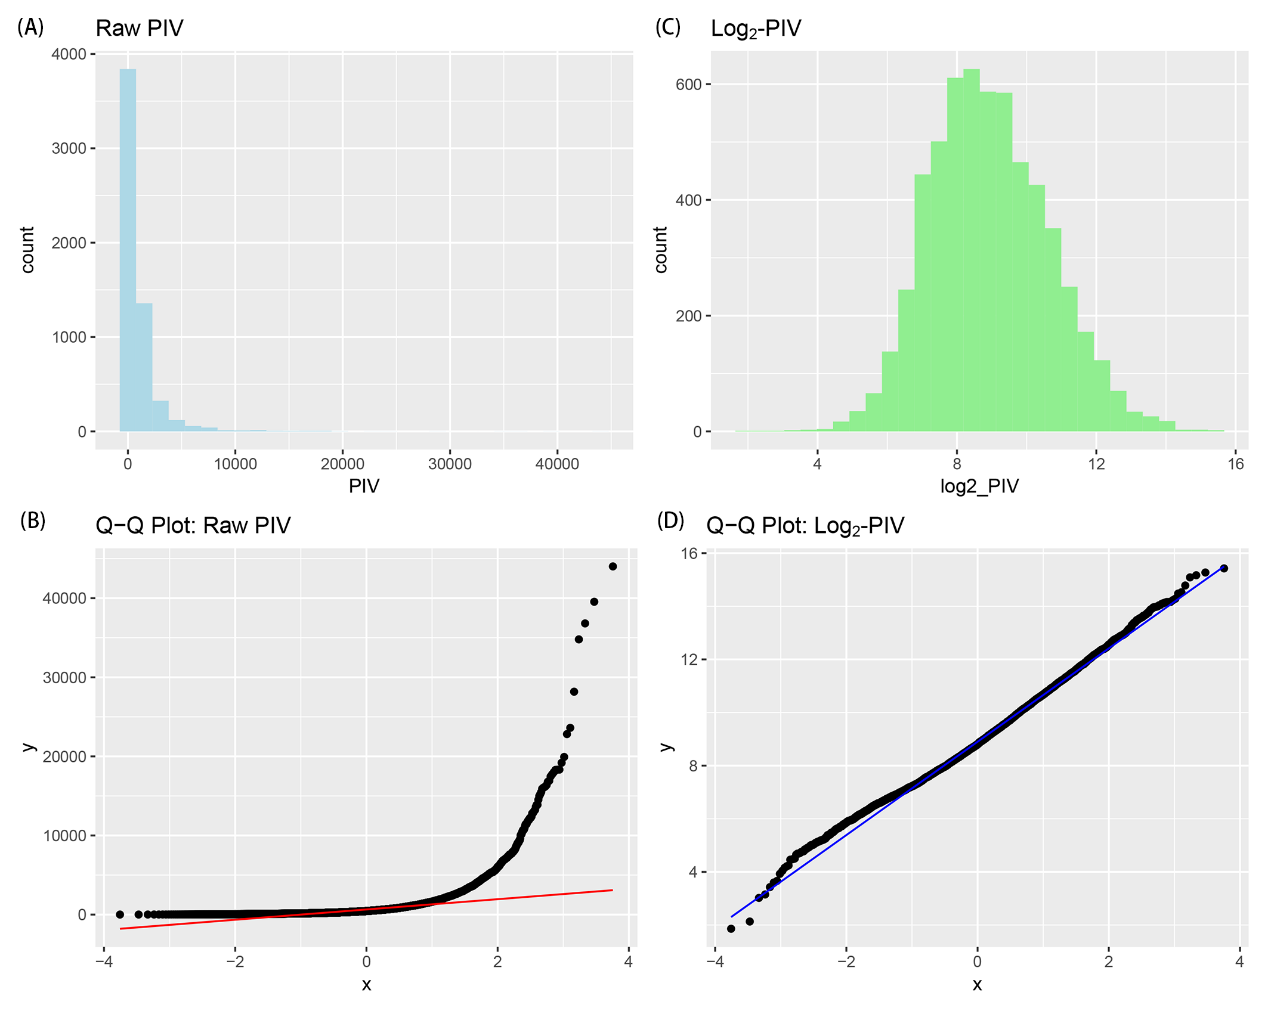
**

**Supplementary Figure 1** Distribution comparison of raw PIV values versus Log₂-PIV values. (A-B) Raw PIV values showing right-skewed distribution; (C-D) Log₂-PIV approximating normal distribution.

**Supplementary Table 1** Baseline Demographics and Clinical Characteristics of Patients with Acute Exacerbation of Chronic Obstructive Pulmonary Disease Grouped by PIV Quartiles

|  | Q1  N=1,455 | Q2  N=1,450 | Q3  N=1,453 | Q4  N=1,452 | *P*-value |
| --- | --- | --- | --- | --- | --- |
| PIV | <210.1 | 210.1–447.5 | 447.5–1086.2 | ≥1086.2 |  |
| LHS＞10 days | 242 (16.6%) | 283 (19.5%) | 328 (22.6%) | 391 (26.9%) | <0.001 |
| Age, years | 74.0 [67.0–80.0] | 75.0 [68.0–81.0] | 76.0 [68.0–82.0] | 77.0 [70.0–82.0] | <0.001 |
| Sex, n (%) |  |  |  |  | 0.037 |
| Female | 445 (30.6%) | 399 (27.5%) | 388 (26.7%) | 380 (26.2%) |  |
| Male | 1010 (69.4%) | 1051 (72.5%) | 1065 (73.3%) | 1072 (73.8%) |  |
| Smoking history, n (%) | 847 (58.2%) | 877 (60.5%) | 916 (63.0%) | 904 (62.3%) | 0.038 |
| Drinking history, n (%) | 622 (42.7%) | 606 (41.8%) | 593 (40.8%) | 600 (41.3%) | 0.749 |
| Comorbidities, n (%) |  |  |  |  |  |
| Hypertension | 591 (40.6%) | 689 (47.5%) | 642 (44.2%) | 663 (45.7%) | 0.002 |
| Diabetes | 140 (9.62%) | 171 (11.8%) | 171 (11.8%) | 186 (12.8%) | 0.052 |
| Coronary artery disease | 449 (30.9%) | 370 (25.5%) | 302 (20.8%) | 252 (17.4%) | <0.001 |
| pH | 7.41 [7.39–7.43] | 7.41 [7.38–7.43] | 7.41 [7.38–7.44] | 7.42 [7.39–7.45] | <0.001 |
| PaO2, mmHg | 7.41 [7.39–7.43] | 7.41 [7.38–7.43] | 7.41 [7.38–7.44] | 7.42 [7.39–7.45] | <0.001 |
| PaCO2, mmHg | 41.0 [37.4–46.0] | 41.3 [37.4–47.4] | 41.2 [36.8–48.8] | 40.3 [36.1–48.1] | 0.028 |
| SO2, % | 97.0 [95.0–98.4] | 96.9 [94.9–98.4] | 96.6 [94.2–98.3] | 96.4 [93.8–98.2] | <0.001 |
| Lactate, mmol/L | 1.30 [1.00–1.70] | 1.30 [1.00–1.80] | 1.40 [1.00–1.80] | 1.40 [1.10–1.90] | <0.001 |
| WBC, 109/L | 4.92 [4.08–5.92] | 6.42 [5.37–7.43] | 8.09 [6.82–9.72] | 12.0 [9.54–15.3] | 0.000 |
| RBC, 1012/L | 4.27 [3.92–4.64] | 4.32 [3.97–4.69] | 4.33 [3.96–4.71] | 4.31 [3.93–4.70] | 0.012 |
| Neutrophil count, 109/L | 3.00 [2.38–3.65] | 4.39 [3.66–5.28] | 6.19 [5.05–7.64] | 10.1 [7.69–13.3] | 0.000 |
| Lymphocyte count, 109/L | 1.36 [0.99–1.74] | 1.24 [0.91–1.60] | 1.08 [0.79–1.45] | 0.85 [0.59–1.22] | <0.001 |
| Monocyte count, 109/L | 0.35 [0.28–0.43] | 0.46 [0.37–0.56] | 0.59 [0.47–0.73] | 0.82 [0.62–1.05] | 0.000 |
| Eosinophil count, 109/L | 0.11 [0.05–0.19] | 0.10 [0.04–0.20] | 0.07 [0.02–0.16] | 0.02 [0.00–0.09] | <0.001 |
| Basophil count, 109/L | 0.02 [0.01–0.03] | 0.02 [0.01–0.03] | 0.02 [0.01–0.03] | 0.02 [0.01–0.03] | <0.001 |
| RDW, % | 14.0 [11.7–16.2] | 13.5 [11.5–16.2] | 15.2 [11.4–16.2] | 15.6 [11.4–16.2] | 0.019 |
| Hemoglobin, g/L | 131 [120–142] | 132 [121–142] | 131 [118–143] | 129 [117–141] | <0.001 |
| Platelet count, 109/L | 164 [130–199] | 190 [155–232] | 202 [162–254] | 238 [190–293] | <0.001 |
| MCV, fL | 93.2 [90.3–96.3] | 92.7 [89.7–96.0] | 92.5 [89.1–96.0] | 91.7 [88.6–95.1] | <0.001 |
| Hematocrit, % | 0.40 [0.37–0.44] | 0.41 [0.37–0.46] | 0.41 [0.37–0.45] | 0.40 [0.36–0.45] | 0.018 |
| BUN, mmol/L | 5.59 [4.54–7.00] | 5.68 [4.43–7.22] | 5.77 [4.50–7.42] | 6.10 [4.69–8.00] | <0.001 |
| Creatinine, umol/L | 68.0 [57.0–80.0] | 69.0 [58.0–84.0] | 69.0 [58.0–85.0] | 70.0 [57.0–87.0] | 0.005 |
| Albumin, g/L | 38.0 [35.4–40.3] | 37.4 [34.9–39.9] | 35.8 [33.0–38.6] | 34.1 [31.0–37.0] | <0.001 |
| Glucose, mmol/L | 5.51 [4.78–7.09] | 6.00 [5.02–7.55] | 6.45 [5.42–8.10] | 7.09 [5.85–8.80] | <0.001 |
| C-reactive protein, mg/L | 2.58 [1.00–10.4] | 7.40 [1.92–25.9] | 25.9 [7.50–55.5] | 68.0 [29.6–124] | 0.000 |

**Abbreviations: BUN, blood urea nitrogen; LHS, Length of Hospital Stay; MCV, mean corpuscular volume; BUN, blood urea nitrogen; PIV: Pan-Immune Inflammation Value; RBC, red blood cell; RDW, red blood cell distribution width; SO2, oxygen saturation; WBC, white blood cell.**

**Supplementary Table 2** Logistic Regression Analysis of PIV in Relation to the Risk of Prolonged Hospital Stay in Patients with Acute Exacerbation of Chronic Obstructive Pulmonary Disease

|  | Model 1 | | Model 2 | | Model 3 | |
| --- | --- | --- | --- | --- | --- | --- |
| OR (95% CI) | *P*-value | OR (95% CI) | *P*-value | OR (95% CI) | *P*-value |
| PIV per unit increase | 1.00(1.00–1.00) | <0.001 | 1.00(1.00–1.00) | <0.001 | 1.00(1.00–1.00) | 0.004 |
| Quartile* |  |  |  |  |  |  |
| Q1 | Ref. |  | Ref. |  | Ref. |  |
| Q2 | 1.22(1.01–1.47) | 0.044 | 1.18(0.98–1.43) | 0.085 | 1.25(1.02–1.53) | 0.034 |
| Q3 | 1.46(1.22–1.76) | <0.001 | 1.41(1.17–1.70) | <0.001 | 1.35(1.09–1.68) | 0.006 |
| Q4 | 1.85(1.54–2.21) | <0.001 | 1.76(1.46–2.12) | <0.001 | 1.66(1.28–2.15) | <0.001 |

* PIV quartile: Q1: <210.1; Q2: 210.1 ≤ PIV < 447.5; Q3: 447.5 ≤ PIV < 1086.2; Q4: ≥1086.2

Model 1 was unadjusted.

Model 2 was adjusted for age, sex, smoking and drinking histories, diabetes mellitus, hypertension, and coronary artery disease (CAD).

Model 3 was adjusted for age, smoking history, diabetes, CAD, PaCO2, SO2, lactate, monocyte count, basophil count, platelet count, red blood cell distribution width, blood urea nitrogen, hematocrit, and albumin.
